# Supplementary material for: Iron-based nanocatalyst for the acceptorless dehydrogenation reactions
Source: PubMed Central journal article supplement (PMC5732290; doi:10.1038/s41467-017-01603-3), 2017-12-15
Supplement: 41467_2017_1603_MOESM1_ESM.pdf [file 41467_2017_1603_MOESM1_ESM.pdf]

## **Description of Additional Supplementary Files**

File Name: Supplementary Movie 1

Description: Hydrogen generation Video file
